# Supplementary material
Source: PubMed Central journal article supplement (PMC3808657)
Supplement: 1305910110_sapp.pdf [file 1305910110_sapp.pdf]

Supporting Information for:

## **Lanthanide Near Infrared Imaging in Living cells with Yb<sup>3+</sup> Nano Metal Organic Frameworks**

Alexandra Foucault-Collet<sup>a</sup>, Kristy A. Gogick<sup>b</sup>, Kiley A. White<sup>b</sup>, Sandrine Villette<sup>a</sup>, Agnès Pallier<sup>a</sup>, Guillaume Collet<sup>a</sup>, Claudine Kieda<sup>a</sup>, Tao Li<sup>b</sup>, Steven J. Geib<sup>b</sup>, Nathaniel L. Rosi<sup>b\*</sup>, Stéphane Petoud<sup>a,b\*</sup>

<sup>a</sup>Centre de Biophysique Moléculaire, CNRS, rue Charles Sadron, 45071 Orléans, France

<sup>b</sup>Department of Chemistry, University of Pittsburgh, 219 Parkman Avenue, Pittsburgh, Pennsylvania 15260

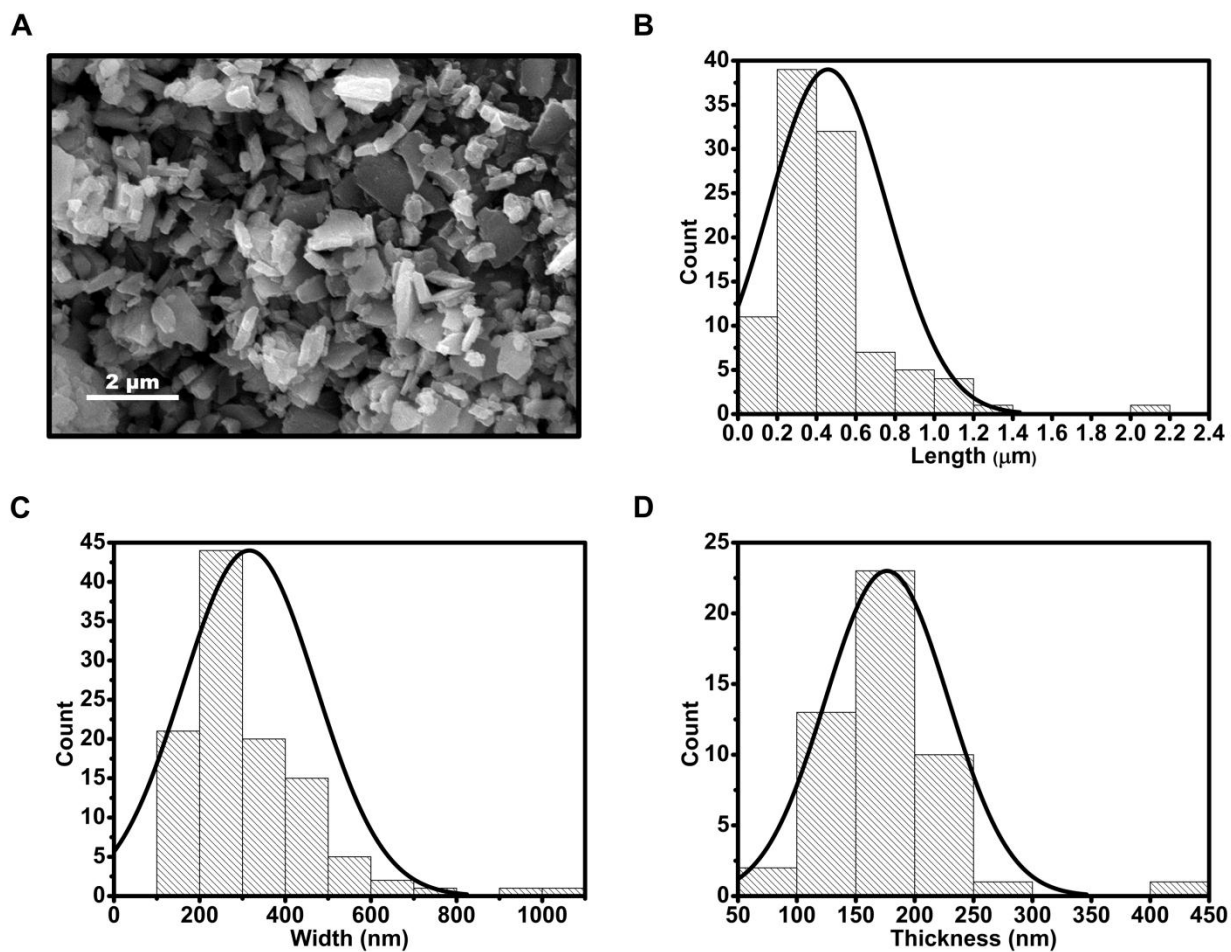

**Fig. S1.** Size characterization of nano-Yb-PVDC-3. Representative SEM image (A) and histograms of length (B), width (C), and thickness (D) measurements.

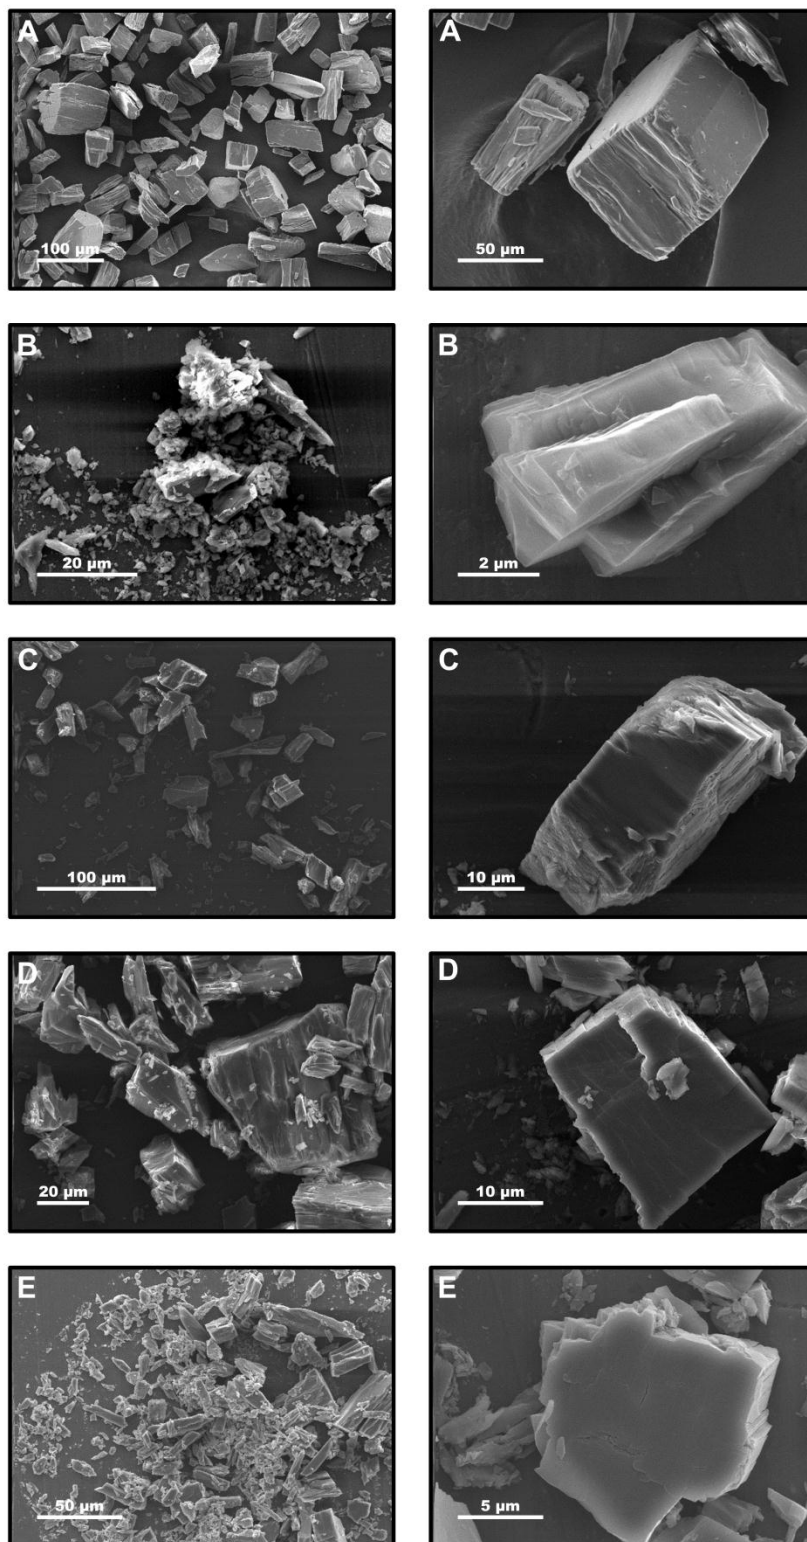

**Fig. S2.** SEM images of Yb-PVDC-3 (A) soaked in water for 1 week (B), 2 weeks (C), 3 weeks (D), and 4 weeks (E).

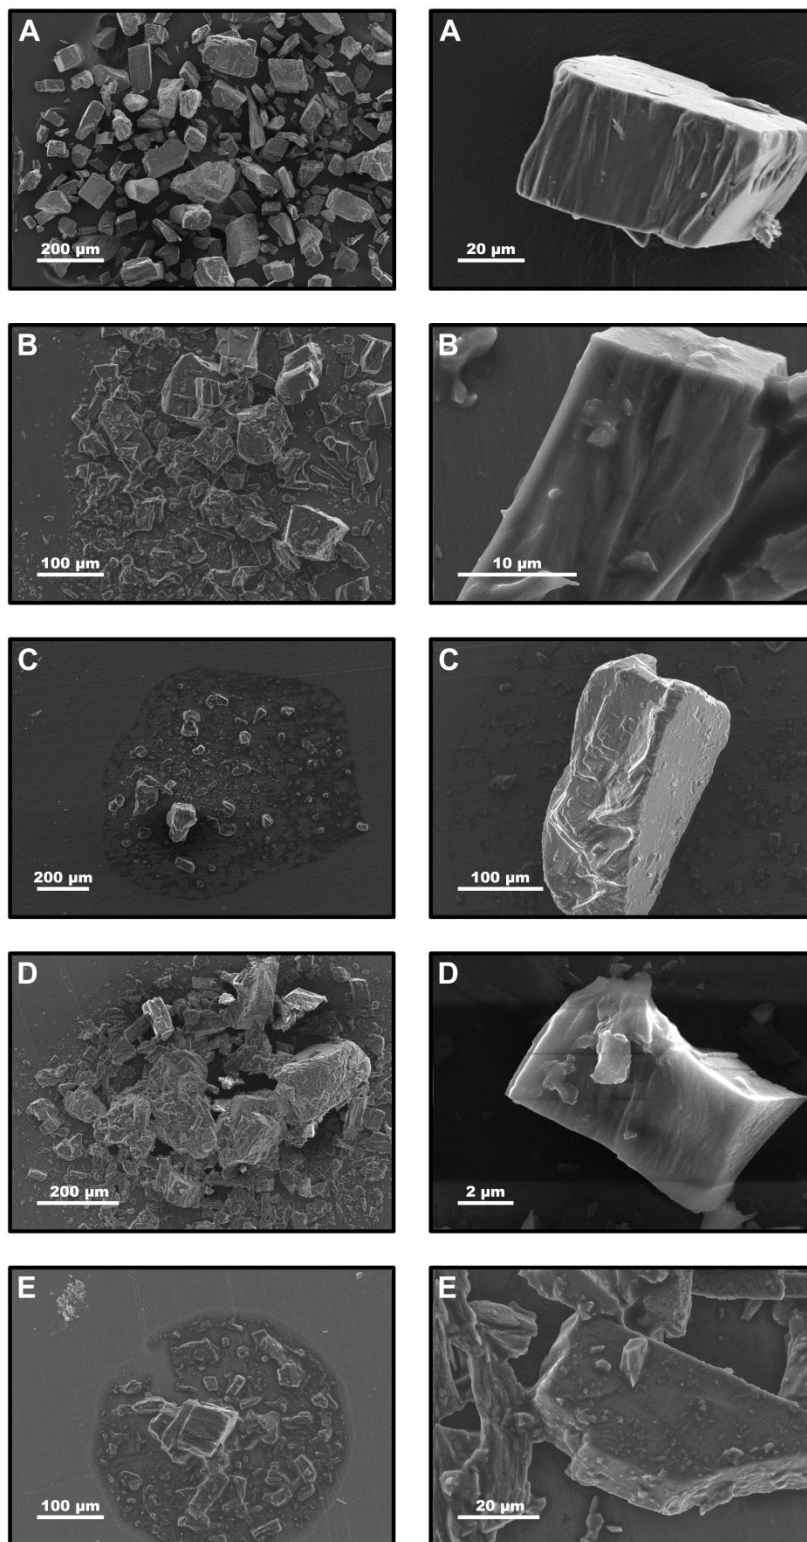

**Fig. S3.** SEM images of Yb-PVDC-3 (A) soaked in 0.1 M HEPES buffer (pH 7.3) for 1 week (B), 2 weeks (C), 3 weeks (D), and 4 weeks (E).

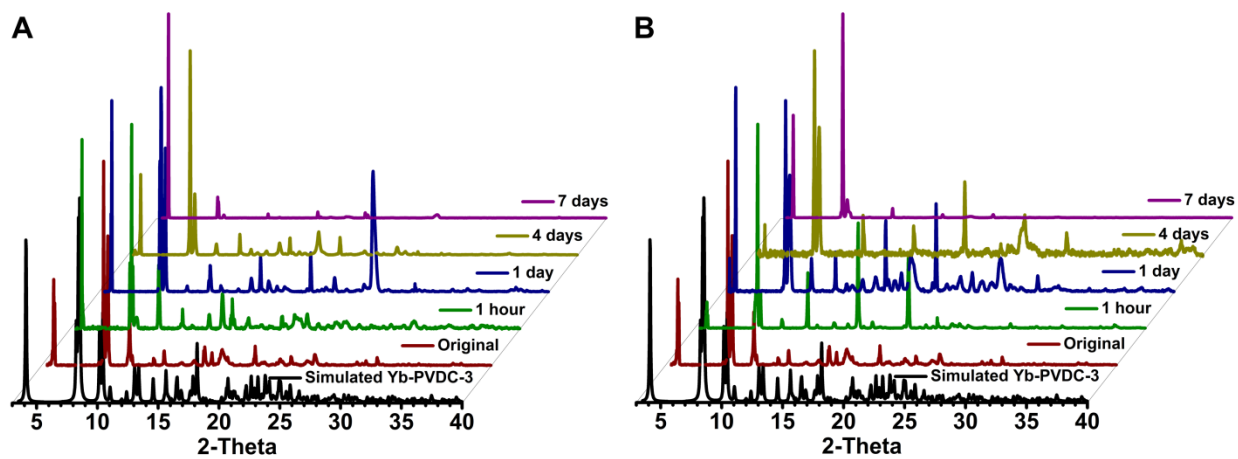

**Fig. S4.** Powder X-ray diffraction patterns over a period of seven days for Yb-PVDC-3 soaked in water (A) or 0.1 M HEPES buffer (pH 7.3) (B).

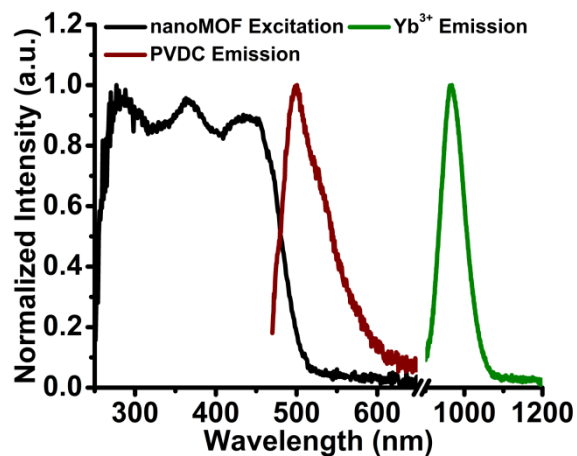

**Fig. S5.** Spectroscopic characterization of nano-Yb-PVDC-3 in water. Nano-Yb-PVDC-3 excitation spectrum (black,  $\lambda_{em} = 980$  nm), and emission spectra for both the ligand (red) and lanthanide (green) obtained by exciting nano-Yb-PVDC-3 at 355 nm.

**Table S1.** Determination of Cellular Uptake by ICP

| Sample        | Concentration of nano-Yb-PVDC-3 in Cell Media ( $\mu\text{g/mL}$ ) | Theoretical Concentration of $\text{Yb}^{3+}$ in Cell Media ( $\mu\text{g/mL}$ ) | Concentration of $\text{Yb}^{3+}$ in $1 \times 10^6$ cells ( $\mu\text{g/mL}$ ) |
|---------------|--------------------------------------------------------------------|----------------------------------------------------------------------------------|---------------------------------------------------------------------------------|
| HeLa Cells    | 0                                                                  | 0                                                                                | $0.000 \pm 0.002$                                                               |
|               | 20                                                                 | 4.06                                                                             | $0.113 \pm 0.003$                                                               |
|               | 30                                                                 | 6.09                                                                             | $0.213 \pm 0.003$                                                               |
|               | 40                                                                 | 8.12                                                                             | $0.270 \pm 0.003$                                                               |
| NIH 3T3 Cells | 0                                                                  | 0                                                                                | $0.000 \pm 0.002$                                                               |
|               | 20                                                                 | 4.06                                                                             | $0.466 \pm 0.010$                                                               |
|               | 30                                                                 | 6.09                                                                             | $0.996 \pm 0.020$                                                               |
|               | 40                                                                 | 8.12                                                                             | $1.130 \pm 0.003$                                                               |

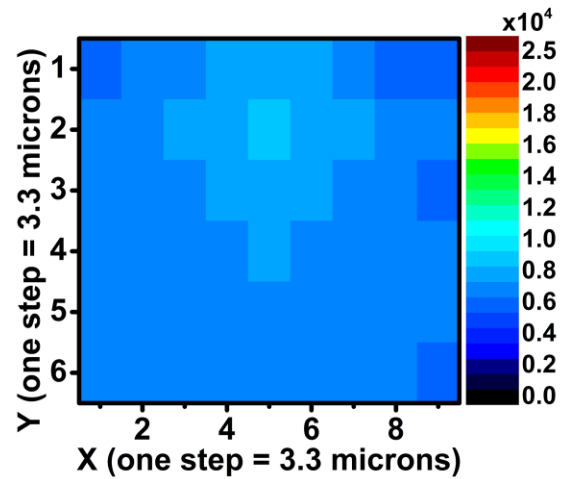

**Fig. S6.** Fluorescence intensity map of untreated NIH 3T3 cells by spectral microscopy in the visible region showing autofluorescence contribution.

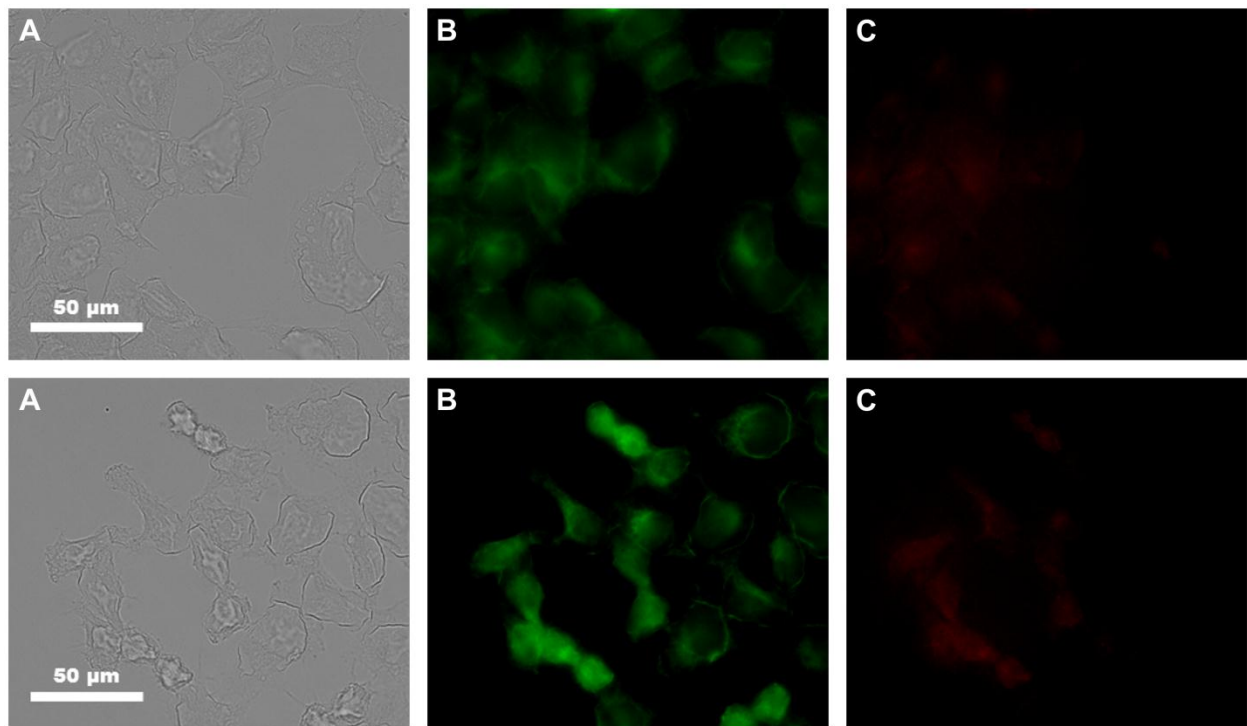

**Fig. S7.** Visible and NIR microscopy of untreated NIH 3T3 (upper) and HeLa cells (lower) showing cell autofluorescence in the visible and NIR. (A) Brightfield, (B) visible, and (C) NIR.

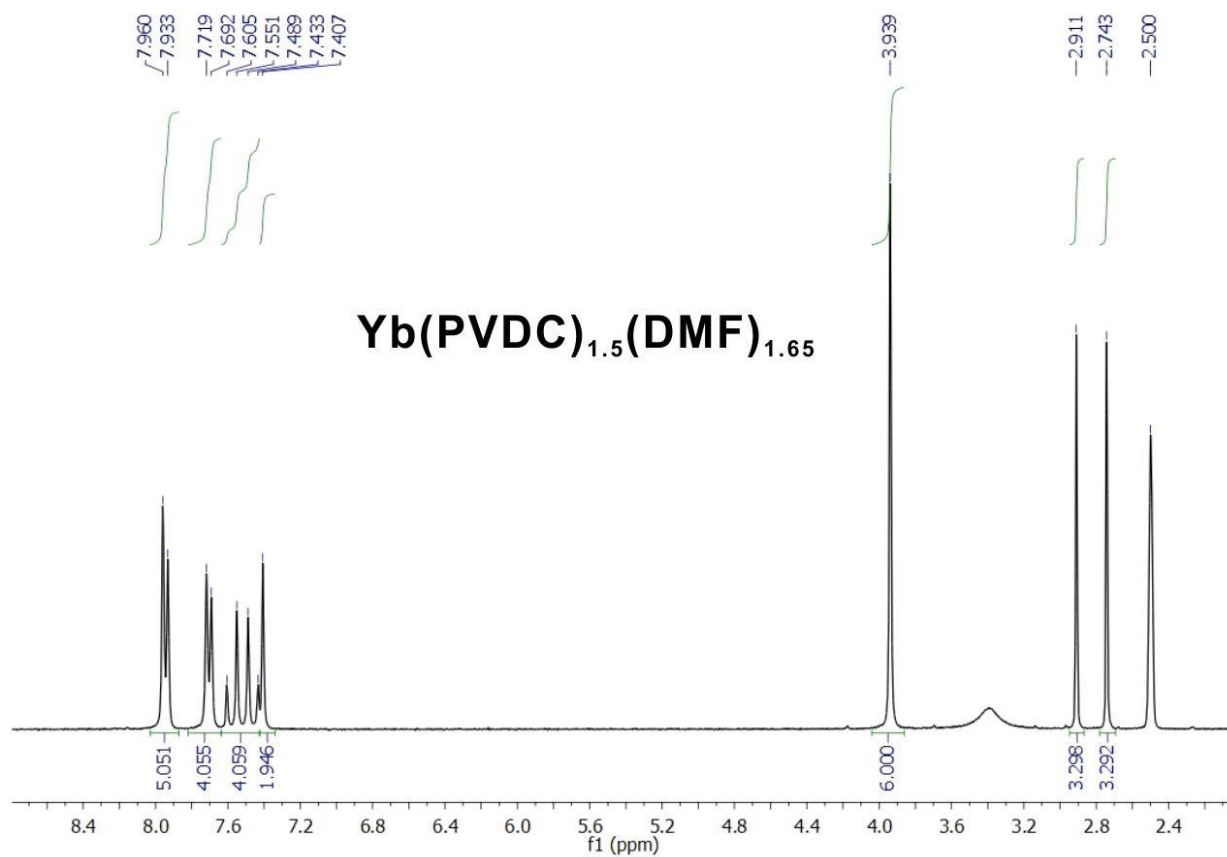

**Fig. S8.**  $^1\text{H}$  NMR of digested Yb-PVDC-3.

Approximately 5 mg of as-synthesized Yb-PVDC-3 was first dried under argon flow and then dissolved in 0.65 mL  $d_6$ -DMSO and 3  $\mu\text{L}$  concentrate DCl mixture. Proton nuclear magnetic resonance spectra ( $^1\text{H}$ -NMR) were collected on Bruker Avance 300 MHz spectrometers. Chemical shifts are in parts per million using the residual solvent peak as the reference value. The value used for proton spectra is 2.5 ppm for  $d_6$ -DMSO. The integration for the six methyl hydrogen atoms in PVDC was set as 6.



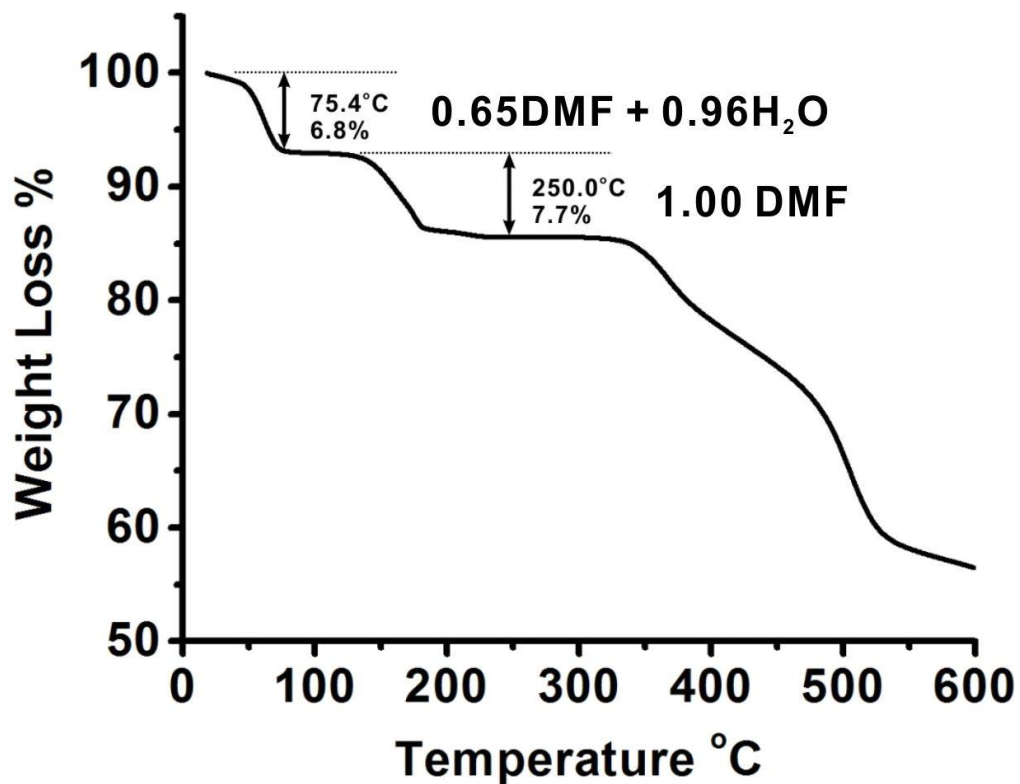

**Fig. S9.** Thermogravimetric analysis (TGA) of Yb-PVDC-3.

Thermogravimetric analysis (TGA) was conducted on a TGA Q500 thermal analysis system. Prior to analysis, as-synthesized Yb-PVDC-3 was dried under argon flow (UHP) to remove excess solvent. Approximately 10 mg of sample were loaded into a platinum pan and heated under a constant N<sub>2</sub> (UHP) flow from room temperature to 600 °C at a rate of 1 °C/min.

## Single Crystal X-ray Diffraction Study for Yb-PVDC3

An X-ray crystal structure was determined for  $C_{42}H_{41}NO_{12}Yb$ , Yb-PVDC-3, using a single crystal on a Bruker Smart Apex CCD diffractometer with graphite-monochromated  $MoK_{\alpha}$  ( $\lambda = 0.71073 \text{ \AA}$ ) radiation. The parameters used during the collection of diffraction data are summarized in Table S1. The crystal was mounted in a glass loop with Paratone<sup>®</sup> N oil and placed in a cold  $N_2$  stream (203 K) for data collection.

Unit-cell parameters and lack of systematic absences indicated Yb-PVDC-3 crystallized in triclinic space groups P 1 or P-1; centrosymmetric P-1 was chosen based on E-values and the successful solution and refinement of the structure. Unit-cell dimensions were derived from the least-squares fit of the angular settings of 1373 reflections. Data were corrected for absorption using the Bruker program SADABS<sup>1</sup>. The structure was solved via direct methods, which located Yb and most of the remaining non-hydrogen atoms. Yb was found to be disordered over at least two sites. The two Yb sites are occupied at 56% and 44%. Remaining non-hydrogen atoms were gradually found from several subsequent different Fourier syntheses. All non-hydrogen atoms were refined anisotropically excepting O6, O11, C24, C27, O12, N, C40, C41, C42, O10, C39A, C39B, and O13. A total of 47 restraints were applied to optimize the bond lengths, bond angles, and atomic displacement parameters. Idealized atom positions were calculated for all hydrogen atoms ( $d$ -(Cmethyl-H) = 0.97  $\text{\AA}$ ,  $d$ -(Cphenyl-H) = 0.94  $\text{\AA}$ ),  $U = 1.2$  *U*<sub>iso</sub> of attached carbon). The coordinated DMF seen in other Ln-PVDC isomorphs could not be resolved in this structure, probably because of overlap with the disordered Yb sites.

All computer programs used in the data collection and refinements are contained in the Bruker program packages SMART (vers. 5.625), SAINT (vers. 6.22)<sup>1</sup>, and SHELXTL (vers. 6.10)<sup>2</sup>.

## References

1. APEX II software suite, Bruker-AXS, 2006.
2. Sheldrick GM (2008) A short history of SHELX. *Acta Crystallogr A* 64(1):112-122.

**Table S2.** Crystal data and structure refinement for Yb-PVDC-3

|                                   |                                                      |                            |
|-----------------------------------|------------------------------------------------------|----------------------------|
| Identification code               | Yb-PVDC-3                                            |                            |
| Empirical formula                 | C <sub>42</sub> H <sub>41</sub> N O <sub>12</sub> Yb |                            |
| Formula weight                    | 924.80                                               |                            |
| Temperature                       | 203(2) K                                             |                            |
| Wavelength                        | 0.71073 Å                                            |                            |
| Crystal system                    | Triclinic                                            |                            |
| Space group                       | P-1                                                  |                            |
| Unit cell dimensions              | a = 8.811(2) Å                                       | $\alpha = 77.152(5)^\circ$ |
|                                   | b = 10.951(3) Å                                      | $\beta = 87.703(5)^\circ$  |
|                                   | c = 21.944(5) Å                                      | $\gamma = 78.251(6)^\circ$ |
| Volume                            | 2021.1(9) Å <sup>3</sup>                             |                            |
| Z                                 | 2                                                    |                            |
| Density (calculated)              | 1.520 Mg/m <sup>3</sup>                              |                            |
| Absorption coefficient            | 2.377 mm <sup>-1</sup>                               |                            |
| F(000)                            | 932                                                  |                            |
| Crystal size                      | 0.30 x 0.13 x 0.08 mm <sup>3</sup>                   |                            |
| Theta range for data collection   | 1.90 to 23.33°                                       |                            |
| Index ranges                      | -9 ≤ h ≤ 9, -12 ≤ k ≤ 12, -24 ≤ l ≤ 24               |                            |
| Reflections collected             | 13440                                                |                            |
| Independent reflections           | 5809 [R(int) = 0.0628]                               |                            |
| Completeness to theta = 23.33°    | 99.5 %                                               |                            |
| Absorption correction             | Multi-Scan (SADABS)                                  |                            |
| Max. and min. transmission        | 0.8326 and 0.5358                                    |                            |
| Refinement method                 | Full-matrix least-squares on F <sup>2</sup>          |                            |
| Data / restraints / parameters    | 5809 / 47 / 469                                      |                            |
| Goodness-of-fit on F <sup>2</sup> | 1.043                                                |                            |
| Final R indices [I > 2σ(I)]       | R1 = 0.1240, wR2 = 0.2941                            |                            |
| R indices (all data)              | R1 = 0.1946, wR2 = 0.3318                            |                            |
| Largest diff. peak and hole       | 2.609 and -1.103 e.Å <sup>-3</sup>                   |                            |

**Table S3.** Atomic coordinates ( $\times 10^4$ ) and equivalent isotropic displacement parameters ( $\text{\AA}^2 \times 10^3$ ) for Yb-PVDC-3.  $U(\text{eq})$  is defined as one third of the trace of the orthogonalized  $U^{ij}$  tensor

|       | x         | y         | z        | U(eq)   |
|-------|-----------|-----------|----------|---------|
| Yb    | 2868(2)   | 4658(4)   | 4952(1)  | 85(1)   |
| Yb'   | 2770(3)   | 3647(6)   | 4893(1)  | 95(2)   |
| O(1)  | 1350(19)  | 3760(20)  | 5765(6)  | 147(7)  |
| C(1)  | 80(30)    | 4220(30)  | 5975(8)  | 96(8)   |
| C(2)  | -150(30)  | 3710(20)  | 6692(8)  | 79(6)   |
| O(2)  | -880(20)  | 5071(18)  | 5680(6)  | 114(6)  |
| O(3)  | -5318(12) | 2141(10)  | 9236(4)  | 61(3)   |
| C(3)  | -1370(20) | 4356(18)  | 6963(7)  | 73(5)   |
| O(4)  | -862(12)  | 1061(10)  | 11080(4) | 61(3)   |
| C(4)  | -1650(20) | 3916(14)  | 7592(6)  | 62(5)   |
| C(5)  | -762(18)  | 2814(13)  | 7925(6)  | 48(4)   |
| O(5)  | -6970(30) | -3110(30) | 14275(7) | 267(18) |
| C(6)  | 480(20)   | 2199(17)  | 7628(7)  | 73(5)   |
| O(6)  | -4643(15) | -2821(12) | 14550(6) | 92(4)   |
| C(7)  | 790(20)   | 2640(20)  | 7018(8)  | 82(6)   |
| O(7)  | 5710(30)  | 4594(18)  | 4345(9)  | 229(11) |
| C(8)  | -1050(20) | 2284(14)  | 8595(7)  | 61(4)   |
| O(8)  | 3980(20)  | 3600(20)  | 4070(8)  | 199(10) |
| C(9)  | -2431(18) | 2474(13)  | 8855(6)  | 51(4)   |
| C(10) | -2732(18) | 2043(13)  | 9521(6)  | 46(4)   |
| C(11) | -4247(18) | 1875(13)  | 9702(6)  | 50(4)   |
| O(11) | 1960(30)  | 2110(20)  | 4938(12) | 203(9)  |
| C(12) | -4569(16) | 1460(13)  | 10342(6) | 46(3)   |
| C(13) | -3446(18) | 1186(12)  | 10788(6) | 47(4)   |
| C(14) | -1932(18) | 1357(13)  | 10603(7) | 54(4)   |
| C(15) | -1640(18) | 1761(12)  | 9970(6)  | 50(4)   |
| C(16) | -3743(18) | 692(14)   | 11455(7) | 57(4)   |
| C(17) | -4962(17) | 157(13)   | 11678(7) | 58(4)   |
| C(18) | -5236(19) | -399(15)  | 12333(6) | 57(4)   |
| C(19) | -6380(20) | -1092(16) | 12468(7) | 74(5)   |
| C(20) | -6590(20) | -1747(17) | 13074(7) | 74(5)   |
| C(21) | -5680(20) | -1751(18) | 13545(6) | 73(5)   |
| C(22) | -4530(20) | -1033(18) | 13417(7) | 77(5)   |
| C(23) | -4350(20) | -368(16)  | 12819(7) | 68(5)   |
| C(24) | -5810(20) | -2590(20) | 14204(9) | 120(8)  |
| C(25) | -6867(16) | 2003(15)  | 9390(7)  | 62(4)   |
| C(26) | 685(18)   | 1206(16)  | 10907(7) | 64(4)   |

|        |           |          |          |         |
|--------|-----------|----------|----------|---------|
| C(27)  | 5030(30)  | 4160(30) | 3970(12) | 153(10) |
| C(28)  | 5770(20)  | 4130(20) | 3316(9)  | 97(7)   |
| C(29)  | 6700(20)  | 4880(20) | 3109(8)  | 151(12) |
| C(30)  | 7390(20)  | 5000(20) | 2535(9)  | 116(9)  |
| C(31)  | 7062(19)  | 4330(18) | 2145(7)  | 68(5)   |
| C(32)  | 6140(20)  | 3484(18) | 2356(8)  | 79(5)   |
| C(33)  | 5470(20)  | 3400(20) | 2932(9)  | 86(6)   |
| C(34)  | 7770(20)  | 4369(18) | 1507(8)  | 87(6)   |
| C(35)  | 8800(30)  | 4747(15) | 1254(8)  | 106(9)  |
| C(36)  | 9370(20)  | 4828(14) | 592(7)   | 62(5)   |
| C(37)  | 10960(20) | 4787(14) | 515(7)   | 61(4)   |
| C(38)  | 8419(18)  | 5052(14) | 92(8)    | 59(4)   |
| O(12)  | -830(50)  | 670(40)  | 3050(20) | 302(17) |
| N      | 870(30)   | 1960(30) | 2892(15) | 170(10) |
| C(40)  | 1290(70)  | 1690(60) | 3560(30) | 300(30) |
| C(41)  | 1750(40)  | 2580(30) | 2295(16) | 172(12) |
| C(42)  | 0(50)     | 1240(40) | 2660(20) | 198(15) |
| O(10)  | 1820(50)  | 6190(30) | 5220(20) | 410(30) |
| C(39A) | 13630(40) | 4620(30) | 884(18)  | 70(13)  |
| O(9)   | 12000(17) | 4626(14) | 995(6)   | 48(6)   |
| C(39B) | 13780(70) | 4390(50) | 740(30)  | 57(18)  |
| O(13)  | 6900(40)  | 5070(30) | -76(15)  | 81(13)  |

---

**Table S4.** Bond lengths [ $\text{\AA}$ ] and angles [ $^\circ$ ] for Yb-PVDC-3

|            |           |
|------------|-----------|
| Yb-Yb'     | 1.163(3)  |
| Yb-O(10)   | 1.95(3)   |
| Yb-O(2)#1  | 2.209(16) |
| Yb-O(1)    | 2.345(13) |
| Yb-O(6)#2  | 2.360(13) |
| Yb-O(7)#3  | 2.40(3)   |
| Yb-O(8)    | 2.54(2)   |
| Yb-O(5)#4  | 2.59(3)   |
| Yb-O(7)    | 2.78(2)   |
| Yb-C(27)   | 2.89(2)   |
| Yb-O(11)   | 3.06(2)   |
| Yb-Yb#3    | 4.001(6)  |
| Yb'-O(11)  | 1.94(2)   |
| Yb'-O(6)#2 | 2.024(14) |
| Yb'-O(8)   | 2.064(16) |
| Yb'-O(2)#1 | 2.181(19) |
| Yb'-O(1)   | 2.257(13) |
| Yb'-C(27)  | 2.83(2)   |
| Yb'-O(10)  | 2.98(3)   |
| Yb'-O(7)   | 3.08(2)   |
| O(1)-C(1)  | 1.24(3)   |
| C(1)-O(2)  | 1.21(3)   |
| C(1)-C(2)  | 1.57(2)   |
| C(2)-C(3)  | 1.35(3)   |
| C(2)-C(7)  | 1.36(3)   |
| O(2)-Yb#1  | 2.181(19) |
| O(2)-Yb#1  | 2.209(16) |
| O(3)-C(11) | 1.361(17) |
| O(3)-C(25) | 1.423(17) |
| C(3)-C(4)  | 1.389(19) |
| C(3)-H(3A) | 0.9400    |
| O(4)-C(14) | 1.376(18) |
| O(4)-C(26) | 1.431(17) |
| C(4)-C(5)  | 1.37(2)   |
| C(4)-H(4A) | 0.9400    |
| C(5)-C(6)  | 1.38(2)   |
| C(5)-C(8)  | 1.487(19) |
| O(5)-C(24) | 1.254(16) |
| O(5)-Yb#5  | 2.59(3)   |

|              |           |
|--------------|-----------|
| C(6)-C(7)    | 1.36(2)   |
| C(6)-H(6A)   | 0.9400    |
| O(6)-C(24)   | 1.254(15) |
| O(6)-Yb#2    | 2.024(13) |
| O(6)-Yb#2    | 2.360(13) |
| C(7)-H(7A)   | 0.9400    |
| O(7)-C(27)   | 1.264(18) |
| O(7)-Yb#3    | 2.40(3)   |
| C(8)-C(9)    | 1.32(2)   |
| C(8)-H(8A)   | 0.9400    |
| O(8)-C(27)   | 1.195(18) |
| C(9)-C(10)   | 1.462(17) |
| C(9)-H(9A)   | 0.9400    |
| C(10)-C(15)  | 1.346(19) |
| C(10)-C(11)  | 1.41(2)   |
| C(11)-C(12)  | 1.413(18) |
| C(12)-C(13)  | 1.361(19) |
| C(12)-H(12A) | 0.9400    |
| C(13)-C(14)  | 1.42(2)   |
| C(13)-C(16)  | 1.475(18) |
| C(14)-C(15)  | 1.392(18) |
| C(15)-H(15A) | 0.9400    |
| C(16)-C(17)  | 1.35(2)   |
| C(16)-H(16A) | 0.9400    |
| C(17)-C(18)  | 1.462(19) |
| C(17)-H(17A) | 0.9400    |
| C(18)-C(23)  | 1.36(2)   |
| C(18)-C(19)  | 1.36(2)   |
| C(19)-C(20)  | 1.39(2)   |
| C(19)-H(19A) | 0.9400    |
| C(20)-C(21)  | 1.34(2)   |
| C(20)-H(20A) | 0.9400    |
| C(21)-C(22)  | 1.39(2)   |
| C(21)-C(24)  | 1.544(17) |
| C(22)-C(23)  | 1.37(2)   |
| C(22)-H(22A) | 0.9400    |
| C(23)-H(23A) | 0.9400    |
| C(25)-H(25A) | 0.9700    |
| C(25)-H(25B) | 0.9700    |
| C(25)-H(25C) | 0.9700    |
| C(26)-H(26A) | 0.9700    |
| C(26)-H(26B) | 0.9700    |
| C(26)-H(26C) | 0.9700    |

|                  |           |
|------------------|-----------|
| C(27)-C(28)      | 1.556(19) |
| C(28)-C(29)      | 1.27(3)   |
| C(28)-C(33)      | 1.35(3)   |
| C(29)-C(30)      | 1.37(3)   |
| C(29)-H(29A)     | 0.9400    |
| C(30)-C(31)      | 1.32(2)   |
| C(30)-H(30A)     | 0.9400    |
| C(31)-C(32)      | 1.35(2)   |
| C(31)-C(34)      | 1.50(2)   |
| C(32)-C(33)      | 1.37(2)   |
| C(32)-H(32A)     | 0.9400    |
| C(33)-H(33A)     | 0.9400    |
| C(34)-C(35)      | 1.15(3)   |
| C(34)-H(34A)     | 0.9400    |
| C(35)-C(36)      | 1.51(2)   |
| C(35)-H(35A)     | 0.9400    |
| C(36)-C(38)      | 1.36(2)   |
| C(36)-C(37)      | 1.40(2)   |
| C(37)-O(9)       | 1.38(2)   |
| C(37)-C(38)#6    | 1.41(2)   |
| C(38)-O(13)      | 1.39(4)   |
| C(38)-C(37)#6    | 1.41(2)   |
| O(12)-C(42)      | 1.25(5)   |
| N-C(42)          | 1.39(4)   |
| N-C(40)          | 1.48(6)   |
| N-C(41)          | 1.58(4)   |
| C(39A)-O(9)      | 1.45(4)   |
| C(39B)-O(13)#6   | 1.53(6)   |
| O(13)-C(39B)#6   | 1.53(6)   |
|                  |           |
| Yb'-Yb-O(10)     | 145.6(15) |
| Yb'-Yb-O(2)#1    | 73.3(5)   |
| O(10)-Yb-O(2)#1  | 87.8(16)  |
| Yb'-Yb-O(1)      | 71.2(5)   |
| O(10)-Yb-O(1)    | 79.7(16)  |
| O(2)#1-Yb-O(1)   | 87.6(5)   |
| Yb'-Yb-O(6)#2    | 59.0(4)   |
| O(10)-Yb-O(6)#2  | 132.7(15) |
| O(2)#1-Yb-O(6)#2 | 132.3(6)  |
| O(1)-Yb-O(6)#2   | 78.7(6)   |
| Yb'-Yb-O(7)#3    | 133.6(5)  |
| O(10)-Yb-O(7)#3  | 63.7(15)  |
| O(2)#1-Yb-O(7)#3 | 151.1(8)  |



|                  |           |
|------------------|-----------|
| O(1)-Yb-O(7)#3   | 92.1(6)   |
| O(6)#2-Yb-O(7)#3 | 75.6(6)   |
| Yb'-Yb-O(8)      | 53.4(6)   |
| O(10)-Yb-O(8)    | 148.9(16) |
| O(2)#1-Yb-O(8)   | 75.4(6)   |
| O(1)-Yb-O(8)     | 124.5(8)  |
| O(6)#2-Yb-O(8)   | 75.6(5)   |
| O(7)#3-Yb-O(8)   | 126.6(7)  |
| Yb'-Yb-O(5)#4    | 139.8(5)  |
| O(10)-Yb-O(5)#4  | 60.2(16)  |
| O(2)#1-Yb-O(5)#4 | 80.8(5)   |
| O(1)-Yb-O(5)#4   | 138.5(8)  |
| O(6)#2-Yb-O(5)#4 | 136.4(6)  |
| O(7)#3-Yb-O(5)#4 | 80.4(5)   |
| O(8)-Yb-O(5)#4   | 90.9(8)   |
| Yb'-Yb-O(7)      | 93.6(5)   |
| O(10)-Yb-O(7)    | 120.5(16) |
| O(2)#1-Yb-O(7)   | 113.9(7)  |
| O(1)-Yb-O(7)     | 149.5(6)  |
| O(6)#2-Yb-O(7)   | 70.8(5)   |
| O(7)#3-Yb-O(7)   | 79.2(7)   |
| O(8)-Yb-O(7)     | 49.0(6)   |
| O(5)#4-Yb-O(7)   | 69.3(7)   |
| Yb'-Yb-C(27)     | 75.4(6)   |
| O(10)-Yb-C(27)   | 134.7(17) |
| O(2)#1-Yb-C(27)  | 91.1(7)   |
| O(1)-Yb-C(27)    | 145.5(8)  |
| O(6)#2-Yb-C(27)  | 76.9(7)   |
| O(7)#3-Yb-C(27)  | 104.9(7)  |
| O(8)-Yb-C(27)    | 24.4(5)   |
| O(5)#4-Yb-C(27)  | 74.9(9)   |
| O(7)-Yb-C(27)    | 25.7(4)   |
| Yb'-Yb-O(11)     | 12.1(5)   |
| O(10)-Yb-O(11)   | 133.6(16) |
| O(2)#1-Yb-O(11)  | 68.6(7)   |
| O(1)-Yb-O(11)    | 60.7(7)   |
| O(6)#2-Yb-O(11)  | 64.9(6)   |
| O(7)#3-Yb-O(11)  | 135.0(6)  |
| O(8)-Yb-O(11)    | 63.9(7)   |
| O(5)#4-Yb-O(11)  | 144.0(6)  |
| O(7)-Yb-O(11)    | 105.7(7)  |
| C(27)-Yb-O(11)   | 86.8(7)   |
| Yb'-Yb-Yb#3      | 117.3(2)  |

|                   |           |
|-------------------|-----------|
| O(10)-Yb-Yb#3     | 95.0(15)  |
| O(2)#1-Yb-Yb#3    | 143.8(3)  |
| O(1)-Yb-Yb#3      | 128.4(4)  |
| O(6)#2-Yb-Yb#3    | 67.8(3)   |
| O(7)#3-Yb-Yb#3    | 43.1(5)   |
| O(8)-Yb-Yb#3      | 84.3(5)   |
| O(5)#4-Yb-Yb#3    | 69.7(5)   |
| O(7)-Yb-Yb#3      | 36.1(6)   |
| C(27)-Yb-Yb#3     | 61.8(5)   |
| O(11)-Yb-Yb#3     | 127.8(5)  |
| Yb-Yb'-O(11)      | 160.7(8)  |
| Yb-Yb'-O(6)#2     | 91.4(4)   |
| O(11)-Yb'-O(6)#2  | 96.9(8)   |
| Yb-Yb'-O(8)       | 99.8(8)   |
| O(11)-Yb'-O(8)    | 96.8(11)  |
| O(6)#2-Yb'-O(8)   | 94.6(6)   |
| Yb-Yb'-O(2)#1     | 76.0(5)   |
| O(11)-Yb'-O(2)#1  | 95.4(8)   |
| O(6)#2-Yb'-O(2)#1 | 167.4(6)  |
| O(8)-Yb'-O(2)#1   | 86.6(6)   |
| Yb-Yb'-O(1)       | 79.6(6)   |
| O(11)-Yb'-O(1)    | 83.4(9)   |
| O(6)#2-Yb'-O(1)   | 88.1(6)   |
| O(8)-Yb'-O(1)     | 177.2(7)  |
| O(2)#1-Yb'-O(1)   | 90.6(6)   |
| Yb-Yb'-C(27)      | 81.1(6)   |
| O(11)-Yb'-C(27)   | 116.9(10) |
| O(6)#2-Yb'-C(27)  | 83.6(7)   |
| O(8)-Yb'-C(27)    | 21.9(7)   |
| O(2)#1-Yb'-C(27)  | 93.3(7)   |
| O(1)-Yb'-C(27)    | 158.8(8)  |
| Yb-Yb'-O(10)      | 21.6(10)  |
| O(11)-Yb'-O(10)   | 139.2(13) |
| O(6)#2-Yb'-O(10)  | 102.5(11) |
| O(8)-Yb'-O(10)    | 116.7(13) |
| O(2)#1-Yb'-O(10)  | 66.0(11)  |
| O(1)-Yb'-O(10)    | 62.0(11)  |
| C(27)-Yb'-O(10)   | 100.8(12) |
| Yb-Yb'-O(7)       | 64.2(4)   |
| O(11)-Yb'-O(7)    | 135.0(9)  |
| O(6)#2-Yb'-O(7)   | 68.4(6)   |
| O(8)-Yb'-O(7)     | 45.9(7)   |
| O(2)#1-Yb'-O(7)   | 104.4(6)  |

|                  |           |
|------------------|-----------|
| O(1)-Yb'-O(7)    | 135.2(7)  |
| C(27)-Yb'-O(7)   | 24.2(4)   |
| O(10)-Yb'-O(7)   | 85.7(11)  |
| C(1)-O(1)-Yb'    | 145.3(15) |
| C(1)-O(1)-Yb     | 131.0(17) |
| Yb'-O(1)-Yb      | 29.20(18) |
| O(2)-C(1)-O(1)   | 124.6(17) |
| O(2)-C(1)-C(2)   | 120(2)    |
| O(1)-C(1)-C(2)   | 115(2)    |
| C(3)-C(2)-C(7)   | 121.9(16) |
| C(3)-C(2)-C(1)   | 117(2)    |
| C(7)-C(2)-C(1)   | 121(2)    |
| C(1)-O(2)-Yb'#1  | 170.3(16) |
| C(1)-O(2)-Yb#1   | 139.6(16) |
| Yb'#1-O(2)-Yb#1  | 30.7(2)   |
| C(11)-O(3)-C(25) | 119.2(11) |
| C(2)-C(3)-C(4)   | 118.9(18) |
| C(2)-C(3)-H(3A)  | 120.6     |
| C(4)-C(3)-H(3A)  | 120.6     |
| C(14)-O(4)-C(26) | 116.7(11) |
| C(5)-C(4)-C(3)   | 120.4(15) |
| C(5)-C(4)-H(4A)  | 119.8     |
| C(3)-C(4)-H(4A)  | 119.8     |
| C(4)-C(5)-C(6)   | 118.3(13) |
| C(4)-C(5)-C(8)   | 122.5(13) |
| C(6)-C(5)-C(8)   | 119.2(14) |
| C(24)-O(5)-Yb#5  | 127.1(19) |
| C(7)-C(6)-C(5)   | 121.5(18) |
| C(7)-C(6)-H(6A)  | 119.2     |
| C(5)-C(6)-H(6A)  | 119.2     |
| C(24)-O(6)-Yb'#2 | 165.9(15) |
| C(24)-O(6)-Yb#2  | 136.3(14) |
| Yb'#2-O(6)-Yb#2  | 29.5(2)   |
| C(6)-C(7)-C(2)   | 118.9(17) |
| C(6)-C(7)-H(7A)  | 120.6     |
| C(2)-C(7)-H(7A)  | 120.6     |
| C(27)-O(7)-Yb#3  | 177(2)    |
| C(27)-O(7)-Yb    | 81.8(17)  |
| Yb#3-O(7)-Yb     | 100.8(7)  |
| C(27)-O(7)-Yb'   | 66.5(14)  |
| Yb#3-O(7)-Yb'    | 115.4(6)  |
| Yb-O(7)-Yb'      | 22.11(18) |
| C(9)-C(8)-C(5)   | 123.2(15) |

|                    |           |
|--------------------|-----------|
| C(9)-C(8)-H(8A)    | 118.4     |
| C(5)-C(8)-H(8A)    | 118.4     |
| C(27)-O(8)-Yb'     | 118(2)    |
| C(27)-O(8)-Yb      | 95(2)     |
| Yb'-O(8)-Yb        | 26.9(3)   |
| C(8)-C(9)-C(10)    | 124.5(14) |
| C(8)-C(9)-H(9A)    | 117.8     |
| C(10)-C(9)-H(9A)   | 117.8     |
| C(15)-C(10)-C(11)  | 118.0(12) |
| C(15)-C(10)-C(9)   | 123.8(14) |
| C(11)-C(10)-C(9)   | 118.2(13) |
| O(3)-C(11)-C(12)   | 124.1(13) |
| O(3)-C(11)-C(10)   | 116.6(11) |
| C(12)-C(11)-C(10)  | 119.3(14) |
| Yb'-O(11)-Yb       | 7.2(3)    |
| C(13)-C(12)-C(11)  | 121.7(13) |
| C(13)-C(12)-H(12A) | 119.2     |
| C(11)-C(12)-H(12A) | 119.2     |
| C(12)-C(13)-C(14)  | 118.7(12) |
| C(12)-C(13)-C(16)  | 122.4(14) |
| C(14)-C(13)-C(16)  | 118.9(14) |
| O(4)-C(14)-C(15)   | 126.0(14) |
| O(4)-C(14)-C(13)   | 115.3(12) |
| C(15)-C(14)-C(13)  | 118.6(15) |
| C(10)-C(15)-C(14)  | 123.7(14) |
| C(10)-C(15)-H(15A) | 118.2     |
| C(14)-C(15)-H(15A) | 118.2     |
| C(17)-C(16)-C(13)  | 125.2(15) |
| C(17)-C(16)-H(16A) | 117.4     |
| C(13)-C(16)-H(16A) | 117.4     |
| C(16)-C(17)-C(18)  | 126.1(16) |
| C(16)-C(17)-H(17A) | 117       |
| C(18)-C(17)-H(17A) | 117       |
| C(23)-C(18)-C(19)  | 116.8(14) |
| C(23)-C(18)-C(17)  | 124.6(15) |
| C(19)-C(18)-C(17)  | 118.4(14) |
| C(18)-C(19)-C(20)  | 121.1(16) |
| C(18)-C(19)-H(19A) | 119.5     |
| C(20)-C(19)-H(19A) | 119.5     |
| C(21)-C(20)-C(19)  | 121.7(16) |
| C(21)-C(20)-H(20A) | 119.2     |
| C(19)-C(20)-H(20A) | 119.2     |
| C(20)-C(21)-C(22)  | 117.8(13) |

|                     |           |
|---------------------|-----------|
| C(20)-C(21)-C(24)   | 121.6(15) |
| C(22)-C(21)-C(24)   | 120.5(15) |
| C(23)-C(22)-C(21)   | 119.8(16) |
| C(23)-C(22)-H(22A)  | 120.1     |
| C(21)-C(22)-H(22A)  | 120.1     |
| C(18)-C(23)-C(22)   | 122.8(16) |
| C(18)-C(23)-H(23A)  | 118.6     |
| C(22)-C(23)-H(23A)  | 118.6     |
| O(6)-C(24)-O(5)     | 128.7(19) |
| O(6)-C(24)-C(21)    | 115.7(16) |
| O(5)-C(24)-C(21)    | 114.4(16) |
| O(3)-C(25)-H(25A)   | 109.5     |
| O(3)-C(25)-H(25B)   | 109.5     |
| H(25A)-C(25)-H(25B) | 109.5     |
| O(3)-C(25)-H(25C)   | 109.5     |
| H(25A)-C(25)-H(25C) | 109.5     |
| H(25B)-C(25)-H(25C) | 109.5     |
| O(4)-C(26)-H(26A)   | 109.5     |
| O(4)-C(26)-H(26B)   | 109.5     |
| H(26A)-C(26)-H(26B) | 109.5     |
| O(4)-C(26)-H(26C)   | 109.5     |
| H(26A)-C(26)-H(26C) | 109.5     |
| H(26B)-C(26)-H(26C) | 109.5     |
| O(8)-C(27)-O(7)     | 129(3)    |
| O(8)-C(27)-C(28)    | 113(2)    |
| O(7)-C(27)-C(28)    | 118(2)    |
| O(8)-C(27)-Yb'      | 40.2(15)  |
| O(7)-C(27)-Yb'      | 89.3(15)  |
| C(28)-C(27)-Yb'     | 153.1(18) |
| O(8)-C(27)-Yb       | 61.1(17)  |
| O(7)-C(27)-Yb       | 72.5(15)  |
| C(28)-C(27)-Yb      | 162.7(18) |
| Yb'-C(27)-Yb        | 23.5(2)   |
| C(29)-C(28)-C(33)   | 116.3(17) |
| C(29)-C(28)-C(27)   | 119(2)    |
| C(33)-C(28)-C(27)   | 125(2)    |
| C(28)-C(29)-C(30)   | 125(2)    |
| C(28)-C(29)-H(29A)  | 117.3     |
| C(30)-C(29)-H(29A)  | 117.3     |
| C(31)-C(30)-C(29)   | 119.2(19) |
| C(31)-C(30)-H(30A)  | 120.4     |
| C(29)-C(30)-H(30A)  | 120.4     |
| C(30)-C(31)-C(32)   | 117.4(16) |

|                      |           |
|----------------------|-----------|
| C(30)-C(31)-C(34)    | 123.9(18) |
| C(32)-C(31)-C(34)    | 118.6(18) |
| C(31)-C(32)-C(33)    | 121.3(18) |
| C(31)-C(32)-H(32A)   | 119.4     |
| C(33)-C(32)-H(32A)   | 119.4     |
| C(28)-C(33)-C(32)    | 120.3(18) |
| C(28)-C(33)-H(33A)   | 119.8     |
| C(32)-C(33)-H(33A)   | 119.8     |
| C(35)-C(34)-C(31)    | 135(2)    |
| C(35)-C(34)-H(34A)   | 112.4     |
| C(31)-C(34)-H(34A)   | 112.4     |
| C(34)-C(35)-C(36)    | 132(3)    |
| C(34)-C(35)-H(35A)   | 114.1     |
| C(36)-C(35)-H(35A)   | 114.1     |
| C(38)-C(36)-C(37)    | 121.1(14) |
| C(38)-C(36)-C(35)    | 123.4(18) |
| C(37)-C(36)-C(35)    | 115.2(18) |
| O(9)-C(37)-C(36)     | 124.8(15) |
| O(9)-C(37)-C(38)#6   | 116.1(17) |
| C(36)-C(37)-C(38)#6  | 119.1(15) |
| C(36)-C(38)-O(13)    | 143(2)    |
| C(36)-C(38)-C(37)#6  | 119.8(15) |
| O(13)-C(38)-C(37)#6  | 97.0(19)  |
| C(42)-N-C(40)        | 122(4)    |
| C(42)-N-C(41)        | 103(3)    |
| C(40)-N-C(41)        | 130(4)    |
| O(12)-C(42)-N        | 115(4)    |
| Yb-O(10)-Yb'         | 12.7(5)   |
| C(37)-O(9)-C(39A)    | 122.2(19) |
| C(38)-O(13)-C(39B)#6 | 125(3)    |

---

Symmetry transformations used to generate equivalent atoms:

|                 |                |                   |
|-----------------|----------------|-------------------|
| #1 -x,-y+1,-z+1 | #2 -x,-y,-z+2  | #3 -x+1,-y+1,-z+1 |
| #4 x+1,y+1,z-1  | #5 x-1,y-1,z+1 | #6 -x+2,-y+1,-z   |

---

**Table S5.** Anisotropic displacement parameters ( $\text{\AA}^2 \times 10^3$ ) for Yb-PVDC-3. The anisotropic displacement factor exponent takes the form:  $-2\pi^2 [ h^2 a^{*2} U^{11} + \dots + 2 h k a^* b^* U^{12} ]$

|       | $U^{11}$ | $U^{22}$ | $U^{33}$ | $U^{23}$ | $U^{13}$ | $U^{12}$ |
|-------|----------|----------|----------|----------|----------|----------|
| Yb    | 88(1)    | 125(3)   | 43(1)    | -15(1)   | 41(1)    | -37(1)   |
| Yb'   | 107(2)   | 146(4)   | 36(1)    | -6(1)    | 38(1)    | -59(2)   |
| O(1)  | 110(11)  | 280(20)  | 51(8)    | -15(10)  | 48(8)    | -75(13)  |
| C(1)  | 105(17)  | 190(20)  | 23(9)    | -10(12)  | 23(11)   | -114(18) |
| C(2)  | 93(14)   | 125(17)  | 44(10)   | -30(11)  | 39(11)   | -73(14)  |
| O(2)  | 125(13)  | 198(17)  | 26(6)    | 13(8)    | 7(7)     | -88(12)  |
| O(3)  | 63(7)    | 84(8)    | 33(5)    | -9(5)    | -2(5)    | -9(6)    |
| C(3)  | 106(14)  | 94(13)   | 28(8)    | -8(8)    | 3(9)     | -50(12)  |
| O(4)  | 61(7)    | 92(8)    | 30(5)    | -8(5)    | 5(5)     | -24(6)   |
| C(4)  | 101(13)  | 35(9)    | 42(8)    | -4(7)    | 30(9)    | -5(9)    |
| C(5)  | 74(10)   | 42(9)    | 35(7)    | -18(7)   | 19(8)    | -21(8)   |
| O(5)  | 220(20)  | 570(50)  | 54(9)    | 47(16)   | -2(11)   | -300(30) |
| C(6)  | 82(12)   | 84(12)   | 53(10)   | -12(9)   | 23(9)    | -24(10)  |
| C(7)  | 67(12)   | 141(19)  | 46(10)   | -31(12)  | 27(9)    | -29(13)  |
| O(7)  | 370(20)  | 123(13)  | 146(15)  | 31(12)   | 167(17)  | -40(16)  |
| C(8)  | 80(12)   | 56(10)   | 39(8)    | -6(7)    | 9(8)     | -2(9)    |
| O(8)  | 107(12)  | 300(20)  | 106(12)  | 59(13)   | 54(10)   | 28(14)   |
| C(9)  | 64(10)   | 44(9)    | 30(7)    | 10(6)    | 8(7)     | -1(8)    |
| C(10) | 65(10)   | 40(8)    | 26(7)    | -1(6)    | 1(7)     | 2(8)     |
| C(11) | 75(11)   | 41(9)    | 30(8)    | -8(6)    | 17(8)    | -6(8)    |
| C(12) | 45(8)    | 50(9)    | 40(8)    | -8(7)    | 2(7)     | -5(7)    |
| C(13) | 68(10)   | 32(8)    | 36(8)    | -5(6)    | 15(8)    | -4(7)    |
| C(14) | 72(11)   | 36(8)    | 48(9)    | -6(7)    | 21(8)    | -6(8)    |
| C(15) | 61(9)    | 33(8)    | 42(8)    | 7(6)     | 19(8)    | 4(7)     |
| C(16) | 62(10)   | 57(10)   | 44(8)    | -4(7)    | 9(8)     | -5(8)    |
| C(17) | 53(9)    | 52(10)   | 49(9)    | 13(7)    | 15(7)    | 5(8)     |
| C(18) | 67(10)   | 77(11)   | 28(8)    | -13(7)   | 6(8)     | -17(9)   |
| C(19) | 90(13)   | 85(13)   | 54(10)   | -5(9)    | 9(9)     | -49(11)  |
| C(20) | 96(13)   | 90(13)   | 43(9)    | 0(9)     | 25(9)    | -55(11)  |
| C(21) | 93(13)   | 121(15)  | 18(7)    | -18(8)   | 17(8)    | -50(12)  |
| C(22) | 90(13)   | 119(15)  | 34(8)    | -13(9)   | 19(8)    | -57(12)  |
| C(23) | 73(11)   | 95(13)   | 45(9)    | -18(9)   | 25(9)    | -40(10)  |
| C(25) | 43(9)    | 71(11)   | 62(10)   | -13(8)   | -4(8)    | 11(8)    |
| C(26) | 63(11)   | 71(11)   | 57(10)   | -16(8)   | -6(8)    | -8(9)    |
| C(28) | 112(16)  | 96(16)   | 61(12)   | 14(12)   | 56(12)   | -12(13)  |
| C(29) | 270(30)  | 190(30)  | 43(11)   | -49(14)  | 66(17)   | -140(30) |
| C(30) | 170(20)  | 150(20)  | 62(13)   | -26(13)  | 36(14)   | -114(19) |

|       |         |        |        |         |        |         |
|-------|---------|--------|--------|---------|--------|---------|
| C(31) | 63(11)  | 96(14) | 38(9)  | 0(9)    | 0(8)   | -19(10) |
| C(32) | 95(14)  | 81(13) | 61(11) | -15(10) | 10(11) | -20(12) |
| C(33) | 87(14)  | 99(15) | 60(12) | 19(11)  | 19(11) | -37(12) |
| C(34) | 93(14)  | 89(14) | 51(10) | 7(9)    | 44(10) | 18(11)  |
| C(35) | 170(20) | 42(10) | 58(11) | 29(8)   | 58(13) | 43(12)  |
| C(36) | 80(12)  | 49(10) | 44(9)  | -4(7)   | 24(9)  | 4(9)    |
| C(37) | 98(14)  | 41(9)  | 45(9)  | -18(7)  | -6(10) | -7(9)   |
| C(38) | 56(10)  | 35(9)  | 80(12) | -11(8)  | -4(9)  | 5(8)    |
| O(9)  | 55(10)  | 65(11) | 29(9)  | -25(7)  | 8(7)   | -11(8)  |

---



**Table S6.** Hydrogen coordinates ( $\times 10^4$ ) and isotropic displacement parameters ( $\text{\AA}^2 \times 10^3$ ) for Yb-PVDC-3

|        | x     | y     | z     | U(eq) |
|--------|-------|-------|-------|-------|
| H(3A)  | -2005 | 5092  | 6729  | 87    |
| H(4A)  | -2463 | 4379  | 7791  | 74    |
| H(6A)  | 1124  | 1459  | 7855  | 87    |
| H(7A)  | 1636  | 2213  | 6822  | 99    |
| H(8A)  | -204  | 1791  | 8845  | 74    |
| H(9A)  | -3279 | 2916  | 8595  | 61    |
| H(12A) | -5583 | 1371  | 10463 | 55    |
| H(15A) | -623  | 1842  | 9849  | 60    |
| H(16A) | -3028 | 754   | 11747 | 68    |
| H(17A) | -5704 | 141   | 11385 | 70    |
| H(19A) | -7026 | -1128 | 12145 | 89    |
| H(20A) | -7406 | -2199 | 13154 | 89    |
| H(22A) | -3872 | -1003 | 13738 | 92    |
| H(23A) | -3584 | 131   | 12742 | 82    |
| H(25A) | -7484 | 2216  | 9011  | 93    |
| H(25B) | -7303 | 2573  | 9662  | 93    |
| H(25C) | -6870 | 1127  | 9604  | 93    |
| H(26A) | 1332  | 975   | 11279 | 96    |
| H(26B) | 678   | 2088  | 10701 | 96    |
| H(26C) | 1093  | 654   | 10624 | 96    |
| H(29A) | 6939  | 5384  | 3373  | 181   |
| H(30A) | 8082  | 5562  | 2419  | 140   |
| H(32A) | 5958  | 2940  | 2102  | 95    |
| H(33A) | 4790  | 2833  | 3063  | 103   |
| H(34A) | 7242  | 3994  | 1257  | 105   |
| H(35A) | 9396  | 5065  | 1505  | 127   |
